# Supplementary material for: Phage integration alters the respiratory strategy of its host
Source: PubMed Central journal article supplement (PMC6814406; doi:10.7554/elife.49081), 2019-10-25

|    |             |                                                                                                      |                                                                         |                                          |           |            |
|----|-------------|------------------------------------------------------------------------------------------------------|-------------------------------------------------------------------------|------------------------------------------|-----------|------------|
| 1  | GGTCGGTGCAC | TTAGGTGAATAAGTTGTATATTTAAAATCTCTTTAATTATCAGTAAATTAATGTAAGTAGGTCATTATTAGTCAAATAAAAATCATTTGTCGATTTCA   | 110                                                                     | MG1655 (HK022)n                          |           |            |
| 2  | GGTCGGTGCAC | TTAGGTGAATAAGTTGTATATTTAAAATCTCTTTTACTATCAATGAATTAATATAAACAGGTCATTATTAGTCAAATAAAAATCATTTGTCGATTTCA   | 110                                                                     | NRG 857C                                 |           |            |
| 3  | GGTCGGTGCAC | TTAGGTGAATAAGTTGTATATTTAAAATATCTTTTGTATCAATGAATTAATGTAAGCAGGTCATTATTAGTCAAATAAAAATCATTTGTCGATTTCA    | 110                                                                     | VR50                                     |           |            |
| 4  | GGTCGGTGCAC | TTAAGGTGAATAAGTTGTATGTTTAAAATCTCTTTTACTATCAATGAATTAAGTATTGGCAGGTCATTATTGGTCAAATAAAAATCATTTGTCGATTTCA | 110                                                                     | 2011C-4315                               |           |            |
| 5  | GGTCGGTGCAC | TTAAGGTGAATAAGTTGTATGTTTAAAATCTCTTTTACTATCAATGAATTAAGTATTGGCAGGTCATTATTGGTCAAATAAAAATCATTTGTCGATTTCA | 110                                                                     | 2013C-3252                               |           |            |
| 6  | GGTCGGTGCAC | TTAAGGTGAATAAGTTGTATGTTTAAAATCTCTTTTACTATCAATGAATTAAGTATTGGCAGGTCATTATTGGTCAAATAAAAATCATTTGTCGATTTCA | 110                                                                     | 2013C-3513                               |           |            |
| 7  | GGTCGGTGCAC | TTAAGGTGAATAAGTTGTATGTTTAAAATCTCTTTTACTATCAATGAATTAAGTATTGGCAGGTCATTATTGGTCAAATAAAAATCATTTGTCGATTTCA | 110                                                                     | 2013C-4187                               |           |            |
| 8  | GGTCGGTGCAC | TTAAGGTGAATAAGTTGTATGTTTAAAATCTCTTTTACTATCAATGAATTAAGTATTGGCAGGTCATTATTGGTCAAATAAAAATCATTTGTCGATTTCA | 110                                                                     | 2013C-4538                               |           |            |
| 9  | GGTCGGTGCAC | TTAAGGTGAATAAGTTGTATGTTTAAAATCTCTTTTACTATCAATGAATTAAGTATTGGCAGGTCATTATTGGTCAAATAAAAATCATTTGTCGATTTCA | 110                                                                     | 2014C-3050                               |           |            |
| 10 | GGTCGGTGCAC | TTAAGGTGAATAAGTTGTATGTTTAAAATCTCTTTTACTATCAATGAATTAAGTATTGGCAGGTCATTATTGGTCAAATAAAAATCATTTGTCGATTTCA | 110                                                                     | 2014C-3051                               |           |            |
| 11 | GGTCGGTGCAC | TTAAGGTGAATAAGTTGTATGTTTAAAATCTCTTTTACTATCAATGAATTAAGTATTGGCAGGTCATTATTGGTCAAATAAAAATCATTTGTCGATTTCA | 110                                                                     | 2015C-3163                               |           |            |
| 12 | GGTCGGTGCAC | TTAAGGTGAATAAGTTGTATGTTTAAAATCTCTTTTACTATCAATGAATTAAGTATTGGCAGGTCATTATTGGTCAAATAAAAATCATTTGTCGATTTCA | 110                                                                     | 97-3250                                  |           |            |
| 13 | GGTCGGTGCAC | TTAAGGTGAATAAGTTGTATGTTTAAAATCTCTTTTACTATCAATGAATTAAGTATTGGCAGGTCATTATTGGTCAAATAAAAATCATTTGTCGATTTCA | 110                                                                     | CFSAN027343                              |           |            |
| 14 | GGTCGGTGCAC | TTAAGGTGAATAAGTTGTATATTTAAAAA                                                                        | ACTCTTTTATTATCAATGAATTAATGTAAGTGGGTCATTATTAGTCAAATAAAAATCATTTGTCGATTTCA | 110                                      | FWSEC0001 |            |
| 15 | GGTCGGTGCAC | TTAAGGTGAATAAGTTGTATGTTTAAAATCTCTTTTACTATCAATGAATTAAGTATTGGCAGGTCATTATTGGTCAAATAAAAATCATTTGTCGATTTCA | 110                                                                     | FWSEC0007                                |           |            |
| 16 | GGTCGGTGCAC | TTAAGGTGAATAAGTTGTATGTTTAAAATCTCTTTTACTATCAATGAATTAAGTATTGGCAGGTCATTATTGGTCAAATAAAAATCATTTGTCGATTTCA | 110                                                                     | FORC_028                                 |           |            |
| 17 | GGTCGGTGCAC | TTAAGGTGAATAAGTTGTATATTTAAAATCTCTTTGACTATCAATGAATTAAGTATAAGAGGTCATTATTAGTCAAATAAAAATCATTTGTCGATTTCA  | 110                                                                     | FORC_042                                 |           |            |
| 18 | GGTCGGTGCAC | TTAAGGTGAATAAGTTGTATGTTTAAAATCTCTTTTACTATCAATGAATTAAGTATTGGCAGGTCATTATTGGTCAAATAAAAATCATTTGTCGATTTCA | 110                                                                     | PSUO103                                  |           |            |
| 19 | GGTCGGTGCAC | TTTAGGTGAATAAGTTGTATATTTAAAATCTCTTTAATTATCAGTAAATTAATGTAAGTAGGTCATTATTAGTCAAATAAAAATCATTTGTCGATTTCA  | 110                                                                     | 14EC007                                  |           |            |
| 20 | GGTCGGTGCAC | TTGGGTGAATAAGTTGTATATTTAAAATCTCTTTAATTATCAGTAAATTAATGTAAGTAGGTCATTATTAGTCAAATAAAAATCATTTGTCGATTTCA   | 110                                                                     | E2348/69                                 |           |            |
| 21 | GGTCGGTGCAC | TTGGGTGAATAAGTTGTATATTTAAAATCTCTTTAATTATCAGTAAATTAATGTAAGTAGGTCATTATTAGTCAAATAAAAATCATTTGTCGATTTCA   | 110                                                                     | EPEC1                                    |           |            |
| 22 | GGTCGGTGCAC | TTAAGGTGAATAAGTTGTATGTTTAAAATCTCTTTTACTATCAATGAATTAAGTATTGGCAGGTCATTATTGGTCAAATAAAAATCATTTGTCGATTTCA | 110                                                                     | C3                                       |           |            |
| 23 | GGTCGGTGCAC | TTGGGTGAATAAGTTGTATATTTAAAATCTCTTTAATTATCAGTAAATTAATGTAAGTAGGTCATTATTAGTCAAATAAAAATCATTTGTCGATTTCA   | 110                                                                     | 382634_2f                                |           |            |
| 24 | GGTCGGTGCAC | TTGGGTGAATAAGTTGTATATTTAAAATCTCTTTTATTATCAATGAATTAATGTAAGC                                           | GGGTCATTATTAGTCAAATAAAAATCATTTGTCGATTTCA                                | 110                                      | STEC299   |            |
| 25 | GGTCGGTGCAC | TTAAGGTGAATAAGTTGTATATTTAAAATCTCTTTTATTATCAATGAATTAATGTAAGC                                          | AGGTCATTATTAGTCAAATAAAAATCATTTGTCGATTTCA                                | 110                                      | 266917_2  |            |
| 26 | GGTCGGTGCAC | TTAAGGTGAATAAGTTGTATATTTAAAATCTCTTTGACTATCAATGAATTAATATAAGC                                          | AGGTCATTATTAGTCAAATAAAAATCATTTGTCGATTTCA                                | 110                                      | AR_0017   |            |
| 27 | GGTCGGTGCAC | TTAAGGTGAATAAGTTGTATATTTAAAATCTCTTTAATTATCAGTAAATTAATGTAAGC                                          | AGGTCATTATTAGTCAAATAAAAATCATTTGTCGATTTCA                                | 110                                      | KSC64     |            |
| 28 | GGTCGGTGCAC | TTTAGGTGAATAAGTTGTATATTTAAAATCTCTTTAATTATCAGTAAATTAATGTAAGTAGGTCATTATTAGTCAAATAAAAATCATTTGTCGATTTCA  | 110                                                                     | WAT                                      |           |            |
| 29 | GGTCGGTGCAC | TTAAGGTGAATAAGTTGTATATTTAAAATCTCTTTTATTATCAATGGATTAATGTAAGC                                          | AGGTCATTATTAGTCAAATAAAAATCATTTGTCGATTTCA                                | 110                                      | ECONIH5   |            |
| 30 | GGTCGGTGCAC | TTAGGTGAATAAGTTGTATATTTAAAATCTCTTTTACTATCAATGAATTAATATAAAC                                           | AGGTCATTATTAGTCAAATAAAAATCATTTGTCGATTTCA                                | 110                                      | LF82      |            |
| 31 | GGTCGGTGCAC | TTAGGTGAATAAGTTGTATATTTGGAACTCTCTTTTATTATCAATAGATTAATATAAGC                                          | AGGTCATTATTAGTCAAATAAAAATCATTTGTCGATTTCA                                | 110                                      | 214-4     |            |
| 32 | GGTCGGTGCAC | TTAAGGTGAATAAGTTGTATATTTAAAATCTCTTTGACTATCAATGAATTAATATGAGC                                          | AGGTCATTATTAGTCAAATAAAAATCATTTGTCGATTTCA                                | 110                                      | 09-00049  |            |
| 33 | GGTCGGTGCAC | TTAGGTGAATAAGTTGTATATTTAAAATCTCTTTGACTATCAATGAATTAATGTGAGTAGGTCATT                                   | TTTAGTCAAATAAAAATCATTTGTCGATTTCA                                        | 110                                      | M6        |            |
| 34 | GGTCGGTGCAC | TTAGGTGAATAAGTTGTATATTTAAAATCTCTTTGACTATCAATGAATTAATGTGAGTAGGTCATT                                   | TTTAGTCAAATAAAAATCATTTGTCGATTTCA                                        | 110                                      | M9        |            |
| 35 | GGTCGGTGCAC | TTAAGGTGAATAAGTTGTATATTTAAAATCTCTTTGACTATCAATGAATTAATATAAGC                                          | AGGTCATTATTAGTCAAATAAAAATCATTTGTCGATTTCA                                | 110                                      | CE10      |            |
| 36 | GGTCGGTGCAC | TTAAGGTGAATAAGTTGTATGTTTAAAATCTCTTTTACTATCAATGAATTAAGTATTGGCAGGTCATTATTGGTCAAATAAAAATCATTTGTCGATTTCA | 110                                                                     | 13E0767                                  |           |            |
| 37 | GGTCGGTGCAC | TTAAGGTGAATAAGTTGTATGTTTAAAATCTCTTTTACTATCAATGAATTAAGTATTGGCAGGTCATTATTGGTCAAATAAAAATCATTTGTCGATTTCA | 110                                                                     | C7                                       |           |            |
| 38 | GGTCGGTGCAC | TTAGGTGAATAAGTTGTATATTTAAAAA                                                                         | ACTCTTTTATTATCAATGAATTAATGTAAGCTGGT                                     | CATTATTAGTCAAATAAAAATCATTTGTCGATTTCA     | 110       | RM8352     |
| 39 | GGTCGGTGCAC | TTGGGTGAATAAGTTGTATATTTAAAATCTCTTTAATTATCAGTAAATTAATGTAAGTAGGTCATTATTAGTCAAATAAAAATCATTTGTCGATTTCA   | 110                                                                     | RM14715                                  |           |            |
| 40 | GGTCGGTGCAC | TTAGGTGAATAAGTTGTATATTTAAAAA                                                                         | ACTCTTTTATTATCAATGAATTAATGTAAGC                                         | GGGTCATTATTAGTCAAATAAAAATCATTTGTCGATTTCA | 110       | 16-9255    |
| 41 | GGTCGGTGCAC | TTAGGTGAATAAGTTGTATATTTAAAAA                                                                         | ACTCTTTTATTATCAATGAATTAATGTAAGC                                         | GGGTCATTATTAGTCAAATAAAAATCATTTGTCGATTTCA | 110       | 2014C-3599 |
| 42 | GGTCGGTGCAC | TTAGGTGAATAAGTTGTATATTTAAAAA                                                                         | ACTCTTTTATTATCAATGAATTAATGTAAGC                                         | GGGTCATTATTAGTCAAATAAAAATCATTTGTCGATTTCA | 110       | 2014C-3655 |
| 43 | GGTCGGTGCAC | TTAGGTGAATAAGTTGTATATTTAAAAA                                                                         | ACTCTTTTATTATCAATGAATTAATGTAAGC                                         | GGGTCATTATTAGTCAAATAAAAATCATTTGTCGATTTCA | 110       | 2014C-4423 |
| 44 | GGTCGGTGCAC | TTAGGTGAATAAGTTGTATATTTAAAAA                                                                         | ACTCTTTTATTATCAATGAATTAATGTAAGC                                         | GGGTCATTATTAGTCAAATAAAAATCATTTGTCGATTTCA | 110       | 2015C-3107 |
| 45 | GGTCGGTGCAC | TTAAGGTGAATAAGTTGTATATTTAAAATCTCTTTTATTATCAATTAATTAATGTAAG                                           | AGGTCATTATTAGTCAAATAAAAATCATTTGTCGATTTCA                                | 110                                      | B7A       |            |
| 46 | GGTCGGTGCAC | TTAGGTGAATAAGTTGTATATTTAAAAA                                                                         | ACTCTTTTATTATCAATGAATTAATGTAAGC                                         | GGGTCATTATTAGTCAAATAAAAATCATTTGTCGATTTCA | 110       | FWSEC0006  |

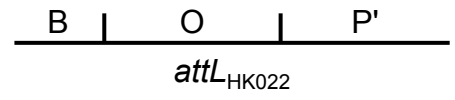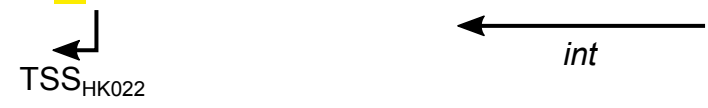

Supplement: elife-49081-supp2.pdf [file elife-49081-supp2.pdf]
